# Supplementary material for: Nanocrystallization of Anthocyanin Extract from Red-Fleshed Apple ′QN-5′ Improved Its Antioxidant Effect through Enhanced Stability and Activity under Stressful Conditions
Source: MDPI journal article supplement (doi:10.3390/molecules24071421), 2019-04-11
Supplement: s1 [file s1]

## Supplemenatry Materials

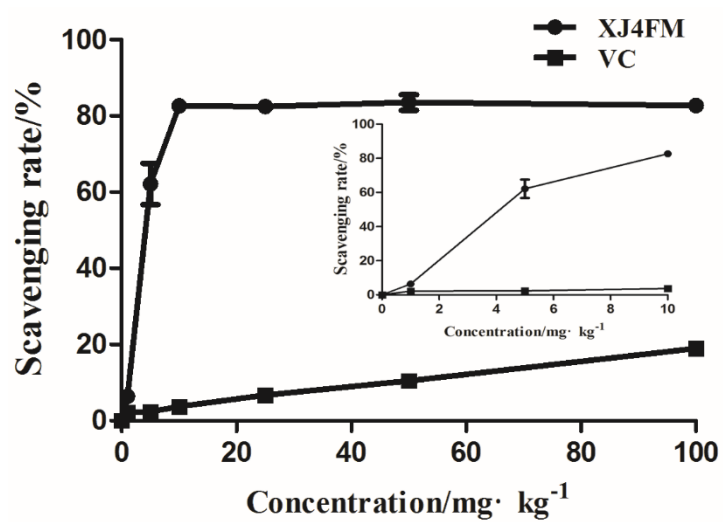

**Figure 1.** The relationship between DPPH radical scavenging rate and concentration of anthocyanin in red-fleshed apple 'QN-5'.
